# Supplementary material
Source: HighWire-hosted journal article supplement (https://bmjopen.bmj.com/content/15/3/e094351)
Supplement: inline-supplementary-material-1 [file inline-supplementary-material-1.pdf]

**Appendix A.** Participants’ sociodemographic and health-related characteristics (*n* = 659)

| Characteristics                           | Mean (SD), n (%) |
|-------------------------------------------|------------------|
| Age ( <i>years</i> )                      | 70.9 (10.2)      |
| Women                                     | 348 (52.8)       |
| White ethnicity‡                          | 645 (97.9)       |
| Country                                   |                  |
| UK                                        | 358 (54.3)       |
| Spain                                     | 122 (18.5)       |
| Romania                                   | 92 (14.0)        |
| Italy                                     | 84 (12.7)        |
| Denmark                                   | 3 (0.5)          |
| Educational attainment                    |                  |
| Primary                                   | 94 (14.7)        |
| Secondary*                                | 266 (39.9)       |
| Degree level or above                     | 280 (42.5)       |
| Other/prefer not to say                   | 19 (2.9)         |
| Number of comorbidities ( <i>n</i> = 638) |                  |
| ≤ 2                                       | 275 (41.7)       |
| 3-5                                       | 297 (45.1)       |
| > 5                                       | 66 (10.0)        |

*IQR*, interquartile range; *SD*, standard deviation  
‡6 (1.1%) identified as Hispanic or Latino ethnicity  
\* High school and Apprentice/Professional Training/Vocational Training were included in the ‘Secondary level’ education group
